# Supplementary material for: Evaluating the Feasibility of Machine-Learning-Based Predictive Models for Precancerous Cervical Lesions in Patients Referred for Colposcopy
Source: Diagnostics (Basel). 2022 Dec 6;12(12):3066. doi: 10.3390/diagnostics12123066 (PMC9776471; doi:10.3390/diagnostics12123066)
Supplement: Supplementary file 1 [file diagnostics-12-03066-s001.zip › diagnostics-2041220-supplementary.pdf]

**Table S1 Combined confusion matrix of different models based on five-fold cross-validation**

|            | Predicted <HSIL | Predicted HSIL+ |
|------------|-----------------|-----------------|
| LR         |                 |                 |
| Ture <HSIL | 5358            | 305             |
| True HSIL+ | 524             | 1271            |
| SVM        |                 |                 |
| Ture <HSIL | 5344            | 319             |
| True HSIL+ | 492             | 1303            |
| DT         |                 |                 |
| Ture <HSIL | 5314            | 349             |
| True HSIL+ | 548             | 1247            |
| NB         |                 |                 |
| Ture <HSIL | 5198            | 465             |
| True HSIL+ | 537             | 1258            |
| RF         |                 |                 |
| Ture <HSIL | 5334            | 329             |
| True HSIL+ | 495             | 1300            |
| XGBoost    |                 |                 |
| Ture <HSIL | 5342            | 321             |
| True HSIL+ | 500             | 1295            |

Abbreviations: <HSIL, normal or low grade squamous intraepithelial lesion; HSIL+, high grade squamous intraepithelial lesion or worse; LR, logistic regression; SVM, support vector machine; DT, decision tree; NB, Naïve Bayes; RF, random forest; XGBoost, extreme gradient boosting

**Table S2 Performance of different models for detecting HSIL+ based on five-fold cross-validation**

| Model | Accuracy (%) | Balanced Accuracy (%) | MCC           |
|-------|--------------|-----------------------|---------------|
| LR    | 88.88 ± 0.81 | 82.71 ± 0.98          | 0.685 ± 0.005 |
| SVM   | 89.13 ± 0.81 | 83.48 ± 0.96          | 0.693 ± 0.005 |
| DT    | 87.85 ± 0.85 | 81.50 ± 1.01          | 0.660 ± 0.006 |
| NB    | 86.56 ± 0.88 | 80.94 ± 1.02          | 0.628 ± 0.006 |
| RF    | 88.95 ± 0.81 | 83.31 ± 0.97          | 0.689 ± 0.005 |
| XGB   | 88.99 ± 0.81 | 83.24 ± 0.97          | 0.670 ± 0.005 |

Data are mean value ± standard deviation

Abbreviations: HSIL+, high grade squamous intraepithelial lesion or worse; LR, logistic regression; SVM, support vector machine; DT, decision tree; NB, Naïve Bayes; RF, random forest; XGBoost, extreme gradient boosting; MCC, Matthews correlation coefficient
